# Supplementary material
Source: PubMed Central journal article supplement (PMC3828541)
Supplement: npp2013180x1.pdf [file npp2013180x1.pdf]

**Chronic phendimetrazine treatment reduces both cocaine choice and extended access  
cocaine consumption in rhesus monkeys**

Banks ML<sup>1,2</sup>, Blough BE<sup>3</sup>, Fennell TR<sup>4</sup>, Snyder RW<sup>4</sup>, Negus SS<sup>1,2</sup>

<sup>1</sup>Department of Pharmacology and Toxicology, Virginia Commonwealth University, Richmond,  
VA 23298, USA

<sup>2</sup>Institute for Drug and Alcohol Studies, Virginia Commonwealth University, Richmond, VA  
23298, USA

<sup>3</sup>Center for Organic and Medicinal Chemistry, Research Triangle Institute International,  
Research Triangle Park, NC 27709, USA

<sup>4</sup>Department of Pharmacology and Toxicology, Research Triangle Institute International,  
Research Triangle Park, NC 27709, USA

**Supplemental Materials:**

**Supplemental Tables 1-3**

**Supplemental Figure S1**

**Supplemental Table 1:** Mean ( $\pm$  s.e.m.) body weight, in kg, before extended cocaine access conditions were initiated and at the end of 21 treatment days with phendimetrazine.

| <b>Experimental Condition</b>    | <b>Mean Body weight in kg</b> |
|----------------------------------|-------------------------------|
| Before extended cocaine access   | 10.96 ( $\pm$ 0.85)           |
| End of phendimetrazine treatment | 11.02 ( $\pm$ 1.00)           |

**Supplemental Table 2:** Effects of 21-day continuous phendimetrazine treatment on cocaine intake during both the 20-h extended cocaine access session (EA) and the cocaine vs. food choice procedure (CH) for each monkey. All data points represent the mean cocaine intakes (mg/kg) of the last 3 days of each 7-day experimental condition for each individual monkey.

| <b>Experimental Condition</b> | <b>M1505</b> |           | <b>M1473</b> |           | <b>M1489</b> |           | <b>M1504</b> |           |
|-------------------------------|--------------|-----------|--------------|-----------|--------------|-----------|--------------|-----------|
|                               | <b>EA</b>    | <b>CH</b> | <b>EA</b>    | <b>CH</b> | <b>EA</b>    | <b>CH</b> | <b>EA</b>    | <b>CH</b> |
| Choice Only                   | -            | 1.2       | -            | 1.3       | -            | 1.2       | -            | 1.2       |
| + 7-day Extended Access       | 7.6          | 0.9       | 6.4          | 1.2       | 4.3          | 1.1       | 7.0          | 0.4       |
| + 14-day Extended Access      | 7.7          | 1.1       | 7.4          | 1.3       | 4.8          | 1.1       | 7.2          | 0.6       |
| + 0.032 mg/kg/h PDM – 7 days  | 6.5          | 0.9       | 5.5          | 1.0       | 1.9          | 0.3       | 4.5          | 0.8       |
| + 1.0 mg/kg/h PDM – 7 days    | 5.0          | 1.1       | 2.2          | 0.2       | 0.3          | 0.1       | 2.5          | 0.6       |
| + 1.0 mg/kg/h PDM – 14 days   | 2.9          | 0.3       | 2.0          | 1.0       | 0.4          | 0.0       | 2.4          | 0.4       |

**Supplemental Table 3:** Individual plasma phendimetrazine (PDM) and phenmetrazine (PM) levels at the end of 21-day treatment days with PDM.

| <b>Monkey ID</b>           | <b>PDM (ng/mL)</b> | <b>PM (ng/mL)</b> |
|----------------------------|--------------------|-------------------|
| M1505                      | 458                | 801               |
| M1473                      | 376                | 819               |
| M1489                      | 620                | 934               |
| M1504                      | 300                | 541               |
| Group Mean ( $\pm$ s.e.m.) | 439 (69)           | 774 (83)          |

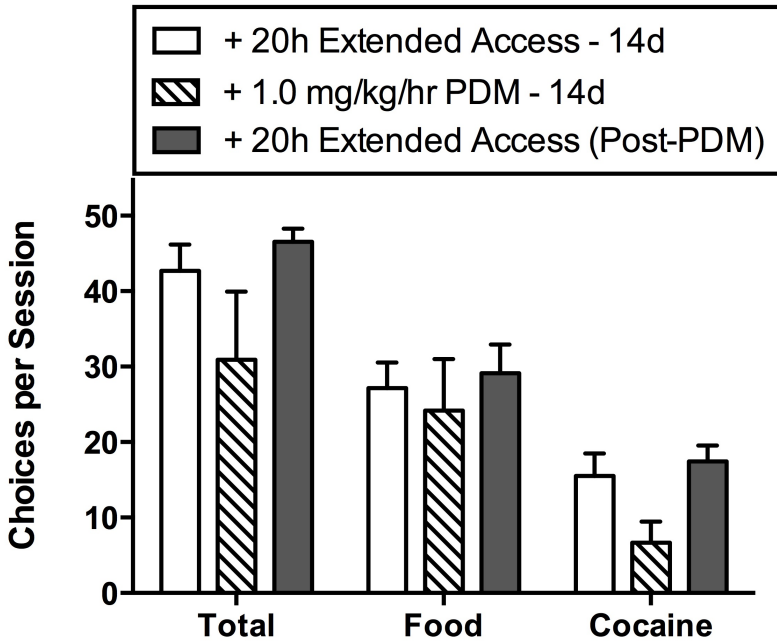

**Supplemental Figure 1:** Recovery of effects following phendimetrazine (PDM) treatment in rhesus monkeys ( $n=3$ ) on total, food, and cocaine choices during the 2-h cocaine vs. food choice session. The fourth monkey that was included in the PDM treatment experiments lost catheter patency during the 7 days post-PDM treatment. Abscissae: experimental endpoint. Ordinate: number of choices completed for the entire choice session. All bars represent group mean  $\pm$  s.e.m. of the last 3-day means for each experimental condition in each monkey.
